# Supplementary material
Source: PubMed Central journal article supplement (PMC9616718)
Supplement: 41388_2022_2483_MOESM1_ESM.pdf [file 41388_2022_2483_MOESM1_ESM.pdf]

## Supplementary Table S1 Gene Set Enrichment Analysis (GSEA)

All Mutants v MCF7-WT

## Pathways UP

| NAME                                       | SIZE | ES  | NES        | NOM p-val | FDR q-val    | FWER p-val | RANK AT MAX |
|--------------------------------------------|------|-----|------------|-----------|--------------|------------|-------------|
| HALLMARK_INTERFERON_ALPHA_RESPONSE         | 82   | 0.6 | <b>2.3</b> | 0         | <b>0</b>     | 0          | 2787        |
| HALLMARK_INTERFERON_GAMMA_RESPONSE         | 141  | 0.5 | <b>2.1</b> | 0         | <b>0</b>     | 0          | 2840        |
| HALLMARK_ESTROGEN_RESPONSE_EARLY           | 198  | 0.4 | <b>1.8</b> | 0         | <b>0.004</b> | 0.018      | 1905        |
| HALLMARK_EPITHELIAL_MESENCHYMAL_TRANSITION | 119  | 0.4 | <b>1.6</b> | 0         | <b>0.031</b> | 0.171      | 2255        |
| HALLMARK_HEDGEHOG_SIGNALING                | 26   | 0.5 | <b>1.5</b> | 0.058     | <b>0.071</b> | 0.424      | 1985        |
| HALLMARK_P53_PATHWAY                       | 184  | 0.3 | <b>1.4</b> | 0.014     | <b>0.088</b> | 0.549      | 1574        |
| HALLMARK_APICAL_JUNCTION                   | 133  | 0.3 | <b>1.4</b> | 0.027     | <b>0.085</b> | 0.59       | 2532        |
| HALLMARK_ESTROGEN_RESPONSE_LATE            | 193  | 0.3 | <b>1.4</b> | 0.024     | <b>0.122</b> | 0.771      | 1388        |
| HALLMARK_APOPTOSIS                         | 123  | 0.3 | <b>1.3</b> | 0.042     | <b>0.111</b> | 0.778      | 2713        |
| HALLMARK_ALLOGRAFT_REJECTION               | 85   | 0.3 | <b>1.3</b> | 0.063     | <b>0.128</b> | 0.852      | 2573        |
| HALLMARK_TNFA_SIGNALING_VIA_NFKB           | 156  | 0.3 | <b>1.3</b> | 0.058     | <b>0.152</b> | 0.924      | 2574        |
| HALLMARK_WNT_BETA_CATENIN_SIGNALING        | 33   | 0.4 | <b>1.2</b> | 0.169     | <b>0.190</b> | 0.965      | 1518        |
| HALLMARK_COAGULATION                       | 64   | 0.3 | <b>1.2</b> | 0.145     | <b>0.179</b> | 0.965      | 1987        |
| HALLMARK_TGF_BETA_SIGNALING                | 51   | 0.3 | <b>1.2</b> | 0.200     | <b>0.247</b> | 0.994      | 1696        |
| HALLMARK_ANGIOGENESIS                      | 23   | 0.4 | 1.1        | 0.348     | 0.409        | 1          | 1432        |
| HALLMARK_INFLAMMATORY_RESPONSE             | 96   | 0.3 | 1.1        | 0.316     | 0.429        | 1          | 2769        |
| HALLMARK_NOTCH_SIGNALING                   | 27   | 0.3 | 1.1        | 0.360     | 0.422        | 1          | 1518        |
| HALLMARK_IL6_JAK_STAT3_SIGNALING           | 46   | 0.3 | 1.0        | 0.401     | 0.438        | 1          | 2770        |
| HALLMARK_APICAL_SURFACE                    | 26   | 0.3 | 0.9        | 0.596     | 0.740        | 1          | 2769        |
| HALLMARK_MITOTIC_SPINDLE                   | 195  | 0.2 | 0.9        | 0.753     | 0.719        | 1          | 2933        |
| HALLMARK_REACTIVE_OXYGEN_SPECIES_PATHWAY   | 45   | 0.2 | 0.8        | 0.734     | 0.807        | 1          | 3352        |

## Pathways DOWN

| NAME                               | SIZE | ES   | NES         | NOM p-val | FDR q-val    | FWER p-val | RANK AT MAX |
|------------------------------------|------|------|-------------|-----------|--------------|------------|-------------|
| HALLMARK_PROTEIN_SECRETION         | 93   | -0.5 | <b>-2.0</b> | 0         | <b>0.002</b> | 0.001      | 3200        |
| HALLMARK_CHOLESTEROL_HOMEOSTASIS   | 65   | -0.5 | <b>-1.9</b> | 0         | <b>0.002</b> | 0.002      | 1719        |
| HALLMARK_OXIDATIVE_PHOSPHORYLATION | 197  | -0.4 | <b>-1.9</b> | 0         | <b>0.002</b> | 0.003      | 3763        |
| HALLMARK_FATTY_ACID_METABOLISM     | 129  | -0.4 | <b>-1.8</b> | 0         | <b>0.005</b> | 0.013      | 1898        |
| HALLMARK_XENOBIOTIC_METABOLISM     | 133  | -0.4 | <b>-1.7</b> | 0         | <b>0.013</b> | 0.041      | 1089        |
| HALLMARK_ANDROGEN_RESPONSE         | 92   | -0.4 | <b>-1.6</b> | 0         | <b>0.027</b> | 0.103      | 1741        |
| HALLMARK_KRAS_SIGNALING_UP         | 101  | -0.4 | <b>-1.6</b> | 0.003     | <b>0.025</b> | 0.11       | 871         |
| HALLMARK_HYPOXIA                   | 163  | -0.3 | <b>-1.6</b> | 0         | <b>0.023</b> | 0.114      | 1411        |
| HALLMARK_MTORC1_SIGNALING          | 192  | -0.3 | <b>-1.5</b> | 0         | <b>0.031</b> | 0.167      | 2537        |
| HALLMARK_ADIPOGENESIS              | 172  | -0.3 | <b>-1.5</b> | 0         | <b>0.033</b> | 0.194      | 1828        |
| HALLMARK_HEME_METABOLISM           | 153  | -0.3 | <b>-1.4</b> | 0.009     | <b>0.051</b> | 0.302      | 1899        |
| HALLMARK_PEROXISOME                | 86   | -0.3 | <b>-1.4</b> | 0.019     | <b>0.056</b> | 0.351      | 2295        |
| HALLMARK_GLYCOLYSIS                | 178  | -0.3 | <b>-1.3</b> | 0.012     | <b>0.113</b> | 0.614      | 2697        |
| HALLMARK_MYC_TARGETS_V1            | 200  | -0.3 | <b>-1.3</b> | 0.013     | <b>0.148</b> | 0.739      | 3635        |
| HALLMARK_BILE_ACID_METABOLISM      | 67   | -0.3 | <b>-1.3</b> | 0.110     | <b>0.162</b> | 0.799      | 2085        |
| HALLMARK_MYOGENESIS                | 113  | -0.3 | <b>-1.2</b> | 0.085     | <b>0.183</b> | 0.862      | 340         |
| HALLMARK_IL2_STAT5_SIGNALING       | 133  | -0.3 | <b>-1.2</b> | 0.089     | <b>0.186</b> | 0.881      | 990         |
| HALLMARK_COMPLEMENT                | 119  | -0.3 | <b>-1.2</b> | 0.117     | <b>0.189</b> | 0.901      | 767         |
| HALLMARK_PI3K_AKT_MTOR_SIGNALING   | 88   | -0.3 | <b>-1.2</b> | 0.143     | <b>0.191</b> | 0.919      | 1701        |
| HALLMARK_KRAS_SIGNALING_DN         | 76   | -0.2 | -1.0        | 0.372     | 0.531        | 0.998      | 1139        |
| HALLMARK_UV_RESPONSE_UP            | 136  | -0.2 | -1.0        | 0.473     | 0.598        | 1          | 2084        |
| HALLMARK_UNFOLDED_PROTEIN_RESPONSE | 110  | -0.2 | -1.0        | 0.478     | 0.579        | 1          | 3433        |
| HALLMARK_UV_RESPONSE_DN            | 124  | -0.2 | -1.0        | 0.491     | 0.590        | 1          | 1637        |
| HALLMARK_G2M_CHECKPOINT            | 198  | -0.2 | -0.9        | 0.705     | 0.762        | 1          | 2806        |
| HALLMARK_E2F_TARGETS               | 199  | -0.2 | -0.9        | 0.728     | 0.750        | 1          | 2800        |
| HALLMARK_DNA_REPAIR                | 144  | -0.2 | -0.8        | 0.884     | 0.910        | 1          | 1491        |
| HALLMARK_SPERMATOGENESIS           | 62   | -0.2 | -0.8        | 0.822     | 0.894        | 1          | 2444        |
| HALLMARK_MYC_TARGETS_V2            | 58   | -0.2 | -0.7        | 0.958     | 0.972        | 1          | 2664        |

## Supplementary Table S2 Gene Set Enrichment Analysis (GSEA)

L536R Clones 1-3 v MCF7-WT

## Pathways UP

| NAME                                     | SIZE | ES  | NES        | NOM p-val | FDR q-val    | FWER p-val | RANK AT MAX |
|------------------------------------------|------|-----|------------|-----------|--------------|------------|-------------|
| HALLMARK_INTERFERON_ALPHA_RESPONSE       | 82   | 0.6 | <b>2.2</b> | 0         | <b>0</b>     | 0          | 1830        |
| HALLMARK_INTERFERON_GAMMA_RESPONSE       | 141  | 0.5 | <b>2.1</b> | 0         | <b>0</b>     | 0          | 1806        |
| HALLMARK_ESTROGEN_RESPONSE_EARLY         | 198  | 0.3 | <b>1.5</b> | 0         | <b>0.041</b> | 0.23       | 1720        |
| HALLMARK_APOPTOSIS                       | 123  | 0.3 | 1.1        | 0.213     | 0.573        | 0.995      | 2123        |
| HALLMARK_WNT_BETA_CATENIN_SIGNALING      | 33   | 0.3 | 1.1        | 0.355     | 0.638        | 0.998      | 1837        |
| HALLMARK_MITOTIC_SPINDLE                 | 195  | 0.2 | 0.9        | 0.698     | 1.000        | 1          | 3021        |
| HALLMARK_REACTIVE_OXYGEN_SPECIES_PATHWAY | 45   | 0.2 | 0.8        | 0.879     | 1.000        | 1          | 3388        |
| HALLMARK_MYC_TARGETS_V2                  | 58   | 0.2 | 0.7        | 0.973     | 1.000        | 1          | 3614        |
| HALLMARK_DNA_REPAIR                      | 144  | 0.1 | 0.6        | 1.000     | 1.000        | 1          | 3737        |
| HALLMARK_E2F_TARGETS                     | 199  | 0.1 | 0.5        | 1.000     | 0.998        | 1          | 3832        |

## Pathways DOWN

| NAME                                       | SIZE | ES   | NES         | NOM p-val | FDR q-val       | FWER p-val | RANK AT MAX |
|--------------------------------------------|------|------|-------------|-----------|-----------------|------------|-------------|
| HALLMARK_HYPOXIA                           | 163  | -0.5 | <b>-2.1</b> | 0         | <b>0.003</b>    | 0.002      | 1728        |
| HALLMARK_KRAS_SIGNALING_UP                 | 101  | -0.5 | <b>-2.1</b> | 0         | <b>0.001</b>    | 0.002      | 1480        |
| HALLMARK_CHOLESTEROL_HOMEOSTASIS           | 65   | -0.5 | <b>-2.0</b> | 0         | <b>9.19E-04</b> | 0.002      | 1890        |
| HALLMARK_ANDROGEN_RESPONSE                 | 92   | -0.5 | <b>-2.0</b> | 0         | <b>6.90E-04</b> | 0.002      | 2438        |
| HALLMARK_PROTEIN_SECRETION                 | 93   | -0.5 | <b>-1.9</b> | 0         | <b>0.002</b>    | 0.005      | 2470        |
| HALLMARK_FATTY_ACID_METABOLISM             | 129  | -0.5 | <b>-1.8</b> | 0.002     | <b>0.001</b>    | 0.006      | 1911        |
| HALLMARK_GLYCOLYSIS                        | 178  | -0.4 | <b>-1.8</b> | 0         | <b>0.001</b>    | 0.006      | 1728        |
| HALLMARK_XENOBIOTIC_METABOLISM             | 133  | -0.4 | <b>-1.8</b> | 0         | <b>0.002</b>    | 0.011      | 1308        |
| HALLMARK_OXIDATIVE_PHOSPHORYLATION         | 197  | -0.4 | <b>-1.7</b> | 0         | <b>0.006</b>    | 0.035      | 3571        |
| HALLMARK_TNFA_SIGNALING_VIA_NFKB           | 156  | -0.4 | <b>-1.7</b> | 0         | <b>0.006</b>    | 0.038      | 1332        |
| HALLMARK_EPITHELIAL_MESENCHYMAL_TRANSITION | 119  | -0.4 | <b>-1.6</b> | 0.002     | <b>0.018</b>    | 0.126      | 1194        |
| HALLMARK_MTORC1_SIGNALING                  | 192  | -0.4 | <b>-1.6</b> | 0.003     | <b>0.018</b>    | 0.14       | 2235        |
| HALLMARK_ESTROGEN_RESPONSE_LATE            | 193  | -0.4 | <b>-1.5</b> | 0.002     | <b>0.024</b>    | 0.198      | 844         |
| HALLMARK_COAGULATION                       | 64   | -0.4 | <b>-1.5</b> | 0.021     | <b>0.030</b>    | 0.259      | 1078        |
| HALLMARK_ANGIOGENESIS                      | 23   | -0.5 | <b>-1.5</b> | 0.053     | <b>0.037</b>    | 0.319      | 2003        |
| HALLMARK_MYOGENESIS                        | 113  | -0.4 | <b>-1.4</b> | 0.023     | <b>0.064</b>    | 0.523      | 1016        |
| HALLMARK_ADIPOGENESIS                      | 172  | -0.3 | <b>-1.4</b> | 0.016     | <b>0.065</b>    | 0.548      | 1733        |
| HALLMARK_COMPLEMENT                        | 119  | -0.3 | <b>-1.4</b> | 0.022     | <b>0.067</b>    | 0.583      | 1682        |
| HALLMARK_IL2_STAT5_SIGNALING               | 133  | -0.3 | <b>-1.4</b> | 0.038     | <b>0.080</b>    | 0.679      | 1728        |
| HALLMARK_KRAS_SIGNALING_DN                 | 76   | -0.4 | <b>-1.3</b> | 0.065     | <b>0.108</b>    | 0.781      | 893         |
| HALLMARK_INFLAMMATORY_RESPONSE             | 96   | -0.3 | <b>-1.3</b> | 0.062     | <b>0.114</b>    | 0.809      | 1871        |
| HALLMARK_BILE_ACID_METABOLISM              | 67   | -0.4 | <b>-1.3</b> | 0.118     | <b>0.140</b>    | 0.883      | 2232        |
| HALLMARK_PEROXISOME                        | 86   | -0.3 | <b>-1.3</b> | 0.100     | <b>0.136</b>    | 0.884      | 2371        |
| HALLMARK_UV_RESPONSE_DN                    | 124  | -0.3 | <b>-1.3</b> | 0.075     | <b>0.142</b>    | 0.906      | 1705        |
| HALLMARK_PI3K_AKT_MTOR_SIGNALING           | 88   | -0.3 | <b>-1.2</b> | 0.103     | <b>0.158</b>    | 0.929      | 3475        |
| HALLMARK_P53_PATHWAY                       | 184  | -0.3 | <b>-1.2</b> | 0.064     | <b>0.152</b>    | 0.929      | 1396        |
| HALLMARK_TGF_BETA_SIGNALING                | 51   | -0.4 | <b>-1.2</b> | 0.164     | <b>0.183</b>    | 0.963      | 1114        |
| HALLMARK_HEME_METABOLISM                   | 153  | -0.3 | <b>-1.2</b> | 0.108     | <b>0.192</b>    | 0.971      | 2244        |
| HALLMARK_UNFOLDED_PROTEIN_RESPONSE         | 110  | -0.3 | -1.2        | 0.174     | 0.251           | 0.996      | 2916        |
| HALLMARK_IL6_JAK_STAT3_SIGNALING           | 46   | -0.3 | -1.1        | 0.262     | 0.263           | 0.998      | 2243        |
| HALLMARK_UV_RESPONSE_UP                    | 136  | -0.3 | -1.1        | 0.247     | 0.309           | 0.998      | 2275        |
| HALLMARK_APICAL_JUNCTION                   | 133  | -0.3 | -1.0        | 0.401     | 0.476           | 1          | 1090        |
| HALLMARK_NOTCH_SIGNALING                   | 27   | -0.3 | -1.0        | 0.440     | 0.510           | 1          | 1479        |
| HALLMARK_APICAL_SURFACE                    | 26   | -0.3 | -1.0        | 0.426     | 0.505           | 1          | 1803        |
| HALLMARK_SPERMATOGENESIS                   | 62   | -0.3 | -0.9        | 0.606     | 0.709           | 1          | 2110        |
| HALLMARK_HEDGEHOG_SIGNALING                | 26   | -0.3 | -0.9        | 0.598     | 0.700           | 1          | 1549        |
| HALLMARK_MYC_TARGETS_V1                    | 200  | -0.2 | -0.8        | 0.876     | 0.858           | 1          | 3764        |
| HALLMARK_ALLOGRAFT_REJECTION               | 85   | -0.2 | -0.8        | 0.840     | 0.865           | 1          | 2156        |
| HALLMARK_G2M_CHECKPOINT                    | 198  | -0.1 | -0.5        | 1.000     | 0.998           | 1          | 2862        |

## Supplementary Table S3 Gene Set Enrichment Analysis (GSEA)

Y537C Clones 1, 2 v MCF7-WT

## Pathways UP

| NAME                                       | SIZE | ES  | NES        | NOM p-val | FDR q-val    | FWER p-val | RANK AT MAX |
|--------------------------------------------|------|-----|------------|-----------|--------------|------------|-------------|
| HALLMARK_EPITHELIAL_MESENCHYMAL_TRANSITION | 119  | 0.4 | <b>1.6</b> | 0.002     | <b>0.049</b> | 0.07       | 1685        |
| HALLMARK_APICAL_JUNCTION                   | 133  | 0.4 | <b>1.5</b> | 0.005     | <b>0.068</b> | 0.179      | 1736        |
| HALLMARK_HEDGEHOG_SIGNALING                | 26   | 0.5 | <b>1.4</b> | 0.057     | <b>0.108</b> | 0.378      | 1684        |
| HALLMARK_ANGIOGENESIS                      | 23   | 0.5 | <b>1.4</b> | 0.089     | <b>0.144</b> | 0.568      | 1465        |
| HALLMARK_INTERFERON_GAMMA_RESPONSE         | 141  | 0.3 | <b>1.3</b> | 0.044     | <b>0.194</b> | 0.761      | 1847        |
| HALLMARK_UV_RESPONSE_DN                    | 124  | 0.3 | <b>1.3</b> | 0.059     | <b>0.183</b> | 0.803      | 1161        |
| HALLMARK_ALLOGRAFT_REJECTION               | 85   | 0.3 | <b>1.2</b> | 0.109     | <b>0.225</b> | 0.897      | 1991        |
| HALLMARK_TGF_BETA_SIGNALING                | 51   | 0.3 | <b>1.2</b> | 0.189     | <b>0.227</b> | 0.931      | 1875        |
| HALLMARK_INTERFERON_ALPHA_RESPONSE         | 82   | 0.3 | 1.2        | 0.197     | 0.264        | 0.966      | 1908        |
| HALLMARK_WNT_BETA_CATENIN_SIGNALING        | 33   | 0.3 | 1.1        | 0.291     | 0.318        | 0.996      | 1440        |
| HALLMARK_MITOTIC_SPINDLE                   | 195  | 0.2 | 1.1        | 0.303     | 0.431        | 1          | 3015        |
| HALLMARK_APICAL_SURFACE                    | 26   | 0.3 | 1.1        | 0.373     | 0.398        | 1          | 1259        |
| HALLMARK_SPERMATOGENESIS                   | 62   | 0.3 | 0.9        | 0.559     | 0.619        | 1          | 1289        |
| HALLMARK_G2M_CHECKPOINT                    | 198  | 0.1 | 0.7        | 1.000     | 0.988        | 1          | 3231        |

## Pathways DOWN

| NAME                                     | SIZE | ES   | NES         | NOM p-val | FDR q-val    | FWER p-val | RANK AT MAX |
|------------------------------------------|------|------|-------------|-----------|--------------|------------|-------------|
| HALLMARK_OXIDATIVE_PHOSPHORYLATION       | 197  | -0.5 | <b>-2.0</b> | 0         | <b>0.002</b> | 0.002      | 3268        |
| HALLMARK_XENOBIOTIC_METABOLISM           | 133  | -0.5 | <b>-1.9</b> | 0         | <b>0.001</b> | 0.002      | 1241        |
| HALLMARK_ANDROGEN_RESPONSE               | 92   | -0.5 | <b>-1.9</b> | 0         | <b>0.001</b> | 0.003      | 2336        |
| HALLMARK_PROTEIN_SECRETION               | 93   | -0.5 | <b>-1.8</b> | 0         | <b>0.001</b> | 0.005      | 3236        |
| HALLMARK_FATTY_ACID_METABOLISM           | 129  | -0.4 | <b>-1.8</b> | 0         | <b>0.002</b> | 0.008      | 2160        |
| HALLMARK_HYPOXIA                         | 163  | -0.4 | <b>-1.7</b> | 0         | <b>0.009</b> | 0.042      | 1441        |
| HALLMARK_ESTROGEN_RESPONSE_LATE          | 193  | -0.4 | <b>-1.6</b> | 0         | <b>0.015</b> | 0.079      | 983         |
| HALLMARK_GLYCOLYSIS                      | 178  | -0.4 | <b>-1.6</b> | 0.002     | <b>0.014</b> | 0.085      | 1961        |
| HALLMARK_IL2_STAT5_SIGNALING             | 133  | -0.4 | <b>-1.6</b> | 0         | <b>0.028</b> | 0.183      | 1603        |
| HALLMARK_ADIPOGENESIS                    | 172  | -0.4 | <b>-1.5</b> | 0.003     | <b>0.030</b> | 0.215      | 2182        |
| HALLMARK_KRAS_SIGNALING_UP               | 101  | -0.4 | <b>-1.5</b> | 0.011     | <b>0.029</b> | 0.228      | 1229        |
| HALLMARK_HEME_METABOLISM                 | 153  | -0.4 | <b>-1.5</b> | 0         | <b>0.029</b> | 0.25       | 1617        |
| HALLMARK_MYC_TARGETS_V1                  | 200  | -0.4 | <b>-1.5</b> | 0.003     | <b>0.030</b> | 0.273      | 4520        |
| HALLMARK_PEROXISOME                      | 86   | -0.4 | <b>-1.5</b> | 0.018     | <b>0.036</b> | 0.341      | 1186        |
| HALLMARK_MTORC1_SIGNALING                | 192  | -0.4 | <b>-1.5</b> | 0.002     | <b>0.039</b> | 0.377      | 2813        |
| HALLMARK_ESTROGEN_RESPONSE_EARLY         | 198  | -0.3 | <b>-1.4</b> | 0.005     | <b>0.069</b> | 0.598      | 1013        |
| HALLMARK_BILE_ACID_METABOLISM            | 67   | -0.4 | <b>-1.3</b> | 0.065     | <b>0.101</b> | 0.76       | 1231        |
| HALLMARK_CHOLESTEROL_HOMEOSTASIS         | 65   | -0.4 | <b>-1.3</b> | 0.075     | <b>0.101</b> | 0.781      | 2420        |
| HALLMARK_KRAS_SIGNALING_DN               | 76   | -0.4 | <b>-1.3</b> | 0.062     | <b>0.096</b> | 0.783      | 834         |
| HALLMARK_MYC_TARGETS_V2                  | 58   | -0.4 | <b>-1.3</b> | 0.085     | <b>0.106</b> | 0.829      | 3171        |
| HALLMARK_TNFA_SIGNALING_VIA_NFKB         | 156  | -0.3 | <b>-1.3</b> | 0.038     | <b>0.103</b> | 0.834      | 1560        |
| HALLMARK_UV_RESPONSE_UP                  | 136  | -0.3 | <b>-1.3</b> | 0.064     | <b>0.137</b> | 0.921      | 1681        |
| HALLMARK_COAGULATION                     | 64   | -0.3 | <b>-1.2</b> | 0.171     | <b>0.217</b> | 0.987      | 1359        |
| HALLMARK_COMPLEMENT                      | 119  | -0.3 | <b>-1.2</b> | 0.155     | 0.255        | 0.993      | 1116        |
| HALLMARK_MYOGENESIS                      | 113  | -0.3 | <b>-1.2</b> | 0.180     | 0.246        | 0.994      | 781         |
| HALLMARK_P53_PATHWAY                     | 184  | -0.3 | <b>-1.1</b> | 0.220     | 0.322        | 1          | 1622        |
| HALLMARK_PI3K_AKT_MTOR_SIGNALING         | 88   | -0.3 | <b>-1.1</b> | 0.334     | 0.423        | 1          | 2888        |
| HALLMARK_UNFOLDED_PROTEIN_RESPONSE       | 110  | -0.3 | <b>-1.0</b> | 0.377     | 0.459        | 1          | 3554        |
| HALLMARK_REACTIVE_OXYGEN_SPECIES_PATHWAY | 45   | -0.3 | <b>-1.0</b> | 0.469     | 0.566        | 1          | 2350        |
| HALLMARK_INFLAMMATORY_RESPONSE           | 96   | -0.3 | <b>-1.0</b> | 0.481     | 0.573        | 1          | 1439        |
| HALLMARK_NOTCH_SIGNALING                 | 27   | -0.3 | <b>-1.0</b> | 0.468     | 0.555        | 1          | 1563        |
| HALLMARK_IL6_JAK_STAT3_SIGNALING         | 46   | -0.3 | <b>-1.0</b> | 0.502     | 0.543        | 1          | 2014        |
| HALLMARK_APOPTOSIS                       | 123  | -0.2 | <b>-0.9</b> | 0.598     | 0.626        | 1          | 1449        |
| HALLMARK_DNA_REPAIR                      | 144  | -0.2 | <b>-0.8</b> | 0.939     | 0.927        | 1          | 2362        |
| HALLMARK_E2F_TARGETS                     | 199  | -0.1 | <b>-0.3</b> | 1.000     | 1.000        | 1          | 4035        |

## Supplementary Table S4 Gene Set Enrichment Analysis (GSEA)

Y537N Clones 1-3 v MCF7-WT

## Pathways UP

| NAME                                       | SIZE | ES  | NES        | NOM p-val | FDR q-val       | FWER p-val | RANK AT MAX |
|--------------------------------------------|------|-----|------------|-----------|-----------------|------------|-------------|
| HALLMARK_INTERFERON_ALPHA_RESPONSE         | 82   | 0.6 | <b>2.3</b> | 0         | <b>0</b>        | 0          | 3027        |
| HALLMARK_INTERFERON_GAMMA_RESPONSE         | 141  | 0.5 | <b>2.1</b> | 0         | <b>0</b>        | 0          | 3071        |
| HALLMARK_ESTROGEN_RESPONSE_EARLY           | 198  | 0.5 | <b>2.0</b> | 0         | <b>0</b>        | 0          | 1805        |
| HALLMARK_APOPTOSIS                         | 123  | 0.5 | <b>2.0</b> | 0         | <b>2.80E-04</b> | 0.001      | 1870        |
| HALLMARK_EPITHELIAL_MESENCHYMAL_TRANSITION | 119  | 0.5 | <b>1.9</b> | 0         | <b>4.19E-04</b> | 0.002      | 1921        |
| HALLMARK_HYPOXIA                           | 163  | 0.4 | <b>1.7</b> | 0         | <b>0.004</b>    | 0.024      | 1685        |
| HALLMARK_ESTROGEN_RESPONSE_LATE            | 193  | 0.4 | <b>1.7</b> | 0         | <b>0.004</b>    | 0.025      | 1898        |
| HALLMARK_TNFA_SIGNALING_VIA_NFKB           | 156  | 0.4 | <b>1.7</b> | 0         | <b>0.004</b>    | 0.033      | 2238        |
| HALLMARK_COAGULATION                       | 64   | 0.5 | <b>1.7</b> | 0.003     | <b>0.007</b>    | 0.061      | 817         |
| HALLMARK_IL6_JAK_STAT3_SIGNALING           | 46   | 0.5 | <b>1.7</b> | 0.006     | <b>0.007</b>    | 0.065      | 2203        |
| HALLMARK_IL2_STAT5_SIGNALING               | 133  | 0.4 | <b>1.6</b> | 0.001     | <b>0.009</b>    | 0.088      | 1906        |
| HALLMARK_GLYCOLYSIS                        | 178  | 0.4 | <b>1.6</b> | 0         | <b>0.008</b>    | 0.092      | 2928        |
| HALLMARK_REACTIVE_OXYGEN_SPECIES_PATHWAY   | 45   | 0.5 | <b>1.5</b> | 0.017     | <b>0.021</b>    | 0.234      | 2872        |
| HALLMARK_P53_PATHWAY                       | 184  | 0.4 | <b>1.5</b> | 0.001     | <b>0.031</b>    | 0.334      | 1835        |
| HALLMARK_INFLAMMATORY_RESPONSE             | 96   | 0.4 | <b>1.5</b> | 0.012     | <b>0.035</b>    | 0.388      | 1399        |
| HALLMARK_COMPLEMENT                        | 119  | 0.4 | <b>1.4</b> | 0.024     | <b>0.056</b>    | 0.57       | 2800        |
| HALLMARK_UV_RESPONSE_DN                    | 124  | 0.4 | <b>1.4</b> | 0.022     | <b>0.057</b>    | 0.601      | 1771        |
| HALLMARK_NOTCH_SIGNALING                   | 27   | 0.5 | <b>1.4</b> | 0.068     | <b>0.058</b>    | 0.623      | 2820        |
| HALLMARK_ALLOGRAFT_REJECTION               | 85   | 0.3 | <b>1.3</b> | 0.082     | <b>0.148</b>    | 0.937      | 2472        |
| HALLMARK_UV_RESPONSE_UP                    | 136  | 0.3 | <b>1.3</b> | 0.070     | <b>0.161</b>    | 0.958      | 2624        |
| HALLMARK_TGF_BETA_SIGNALING                | 51   | 0.3 | <b>1.2</b> | 0.236     | <b>0.317</b>    | 0.999      | 2084        |
| HALLMARK_XENOBIOTIC_METABOLISM             | 133  | 0.3 | <b>1.2</b> | 0.173     | <b>0.307</b>    | 0.999      | 2299        |
| HALLMARK_APICAL_SURFACE                    | 26   | 0.4 | <b>1.1</b> | 0.265     | <b>0.353</b>    | 1          | 601         |
| HALLMARK_KRAS_SIGNALING_UP                 | 101  | 0.3 | <b>1.1</b> | 0.221     | <b>0.348</b>    | 1          | 1865        |
| HALLMARK_HEME_METABOLISM                   | 153  | 0.3 | <b>1.1</b> | 0.279     | <b>0.423</b>    | 1          | 2605        |
| HALLMARK_PEROXISOME                        | 86   | 0.3 | <b>1.1</b> | 0.326     | <b>0.434</b>    | 1          | 2417        |
| HALLMARK_APICAL_JUNCTION                   | 133  | 0.3 | <b>1.1</b> | 0.311     | <b>0.442</b>    | 1          | 2100        |
| HALLMARK_BILE_ACID_METABOLISM              | 67   | 0.3 | <b>1.1</b> | 0.344     | <b>0.452</b>    | 1          | 2276        |
| HALLMARK_ADIPOGENESIS                      | 172  | 0.2 | <b>1.0</b> | 0.444     | <b>0.567</b>    | 1          | 1978        |
| HALLMARK_PI3K_AKT_MTOR_SIGNALING           | 88   | 0.3 | <b>1.0</b> | 0.460     | <b>0.573</b>    | 1          | 3347        |
| HALLMARK_ANDROGEN_RESPONSE                 | 92   | 0.3 | <b>1.0</b> | 0.506     | <b>0.595</b>    | 1          | 2362        |
| HALLMARK_KRAS_SIGNALING_DN                 | 76   | 0.2 | <b>0.9</b> | 0.713     | <b>0.846</b>    | 1          | 2083        |
| HALLMARK_ANGIOGENESIS                      | 23   | 0.3 | <b>0.9</b> | 0.686     | <b>0.857</b>    | 1          | 2158        |
| HALLMARK_PROTEIN_SECRETION                 | 93   | 0.2 | <b>0.9</b> | 0.738     | <b>0.833</b>    | 1          | 2313        |
| HALLMARK_MTORC1_SIGNALING                  | 192  | 0.2 | <b>0.8</b> | 0.938     | <b>0.946</b>    | 1          | 2577        |
| HALLMARK_OXIDATIVE_PHOSPHORYLATION         | 197  | 0.2 | <b>0.7</b> | 0.996     | <b>1.000</b>    | 1          | 2910        |
| HALLMARK_UNFOLDED_PROTEIN_RESPONSE         | 110  | 0.2 | <b>0.6</b> | 0.999     | <b>0.994</b>    | 1          | 2696        |

## Pathways DOWN

| NAME                                | SIZE | ES   | NES         | NOM p-val | FDR q-val    | FWER p-val | RANK AT MAX |
|-------------------------------------|------|------|-------------|-----------|--------------|------------|-------------|
| HALLMARK_E2F_TARGETS                | 199  | -0.5 | <b>-2.3</b> | 0         | <b>0</b>     | 0          | 3731        |
| HALLMARK_G2M_CHECKPOINT             | 198  | -0.4 | <b>-2.2</b> | 0         | <b>0</b>     | 0          | 2706        |
| HALLMARK_CHOLESTEROL_HOMEOSTASIS    | 65   | -0.4 | <b>-1.5</b> | 0.006     | <b>0.033</b> | 0.117      | 2294        |
| HALLMARK_MYC_TARGETS_V1             | 200  | -0.3 | <b>-1.4</b> | 0         | <b>0.063</b> | 0.268      | 4032        |
| HALLMARK_MYC_TARGETS_V2             | 58   | -0.3 | <b>-1.3</b> | 0.103     | <b>0.188</b> | 0.67       | 3745        |
| HALLMARK_MYOGENESIS                 | 113  | -0.3 | <b>-1.2</b> | 0.075     | <b>0.197</b> | 0.762      | 644         |
| HALLMARK_MITOTIC_SPINDLE            | 195  | -0.2 | <b>-1.2</b> | 0.079     | <b>0.269</b> | 0.9        | 2359        |
| HALLMARK_HEDGEHOG_SIGNALING         | 26   | -0.3 | <b>-1.0</b> | 0.363     | <b>0.530</b> | 0.998      | 34          |
| HALLMARK_FATTY_ACID_METABOLISM      | 129  | -0.2 | <b>-1.0</b> | 0.374     | <b>0.505</b> | 0.998      | 625         |
| HALLMARK_WNT_BETA_CATENIN_SIGNALING | 33   | -0.3 | <b>-1.0</b> | 0.420     | <b>0.494</b> | 0.999      | 1793        |
| HALLMARK_SPERMATOGENESIS            | 62   | -0.2 | <b>-0.9</b> | 0.715     | <b>0.828</b> | 1          | 2196        |
| HALLMARK_DNA_REPAIR                 | 144  | -0.2 | <b>-0.7</b> | 0.988     | <b>0.956</b> | 1          | 2556        |

## Supplementary Table S5 Gene Set Enrichment Analysis (GSEA)

Y5375 Clones 1-3 v MCF7-WT

## Pathways UP

| NAME                                       | SIZE | ES  | NES        | NOM p-val | FDR q-val    | FWER p-val | RANK AT MAX |
|--------------------------------------------|------|-----|------------|-----------|--------------|------------|-------------|
| HALLMARK_INTERFERON_ALPHA_RESPONSE         | 82   | 0.6 | <b>2.4</b> | 0         | <b>0</b>     | 0          | 1720        |
| HALLMARK_INTERFERON_GAMMA_RESPONSE         | 141  | 0.5 | <b>2.2</b> | 0         | <b>0</b>     | 0          | 1720        |
| HALLMARK_ESTROGEN_RESPONSE_EARLY           | 198  | 0.5 | <b>2.1</b> | 0         | <b>0</b>     | 0          | 1863        |
| HALLMARK_ESTROGEN_RESPONSE_LATE            | 193  | 0.4 | <b>1.8</b> | 0         | <b>0.003</b> | 0.014      | 1849        |
| HALLMARK_EPITHELIAL_MESENCHYMAL_TRANSITION | 119  | 0.4 | <b>1.8</b> | 0         | <b>0.002</b> | 0.014      | 2026        |
| HALLMARK_TNFA_SIGNALING_VIA_NFKB           | 156  | 0.4 | <b>1.6</b> | 0.003     | <b>0.011</b> | 0.082      | 2199        |
| HALLMARK_ALLOGRAFT_REJECTION               | 85   | 0.4 | <b>1.6</b> | 0.002     | <b>0.015</b> | 0.123      | 1973        |
| HALLMARK_P53_PATHWAY                       | 184  | 0.3 | <b>1.5</b> | 0.003     | <b>0.044</b> | 0.359      | 1325        |
| HALLMARK_WNT_BETA_CATENIN_SIGNALING        | 33   | 0.4 | <b>1.4</b> | 0.055     | <b>0.050</b> | 0.434      | 2313        |
| HALLMARK_APICAL_JUNCTION                   | 133  | 0.3 | <b>1.4</b> | 0.020     | <b>0.054</b> | 0.494      | 1283        |
| HALLMARK_TGF_BETA_SIGNALING                | 51   | 0.4 | <b>1.4</b> | 0.036     | <b>0.057</b> | 0.543      | 663         |
| HALLMARK_ANGIOGENESIS                      | 23   | 0.5 | <b>1.4</b> | 0.077     | <b>0.054</b> | 0.553      | 2522        |
| HALLMARK_COAGULATION                       | 64   | 0.3 | <b>1.3</b> | 0.064     | <b>0.092</b> | 0.789      | 1969        |
| HALLMARK_INFLAMMATORY_RESPONSE             | 96   | 0.3 | <b>1.3</b> | 0.074     | <b>0.131</b> | 0.907      | 1973        |
| HALLMARK_IL6_JAK_STAT3_SIGNALING           | 46   | 0.4 | <b>1.3</b> | 0.140     | <b>0.136</b> | 0.933      | 2348        |
| HALLMARK_APOPTOSIS                         | 123  | 0.3 | <b>1.2</b> | 0.122     | <b>0.201</b> | 0.99       | 2308        |
| HALLMARK_APICAL_SURFACE                    | 26   | 0.4 | <b>1.2</b> | 0.210     | <b>0.192</b> | 0.991      | 2749        |
| HALLMARK_KRAS_SIGNALING_DN                 | 76   | 0.3 | <b>1.1</b> | 0.237     | 0.293        | 0.998      | 1912        |
| HALLMARK_UV_RESPONSE_DN                    | 124  | 0.3 | <b>1.1</b> | 0.271     | 0.325        | 1          | 2209        |
| HALLMARK_HEDGEHOG_SIGNALING                | 26   | 0.4 | <b>1.1</b> | 0.372     | 0.328        | 1          | 2601        |
| HALLMARK_MITOTIC_SPINDLE                   | 195  | 0.2 | <b>1.0</b> | 0.388     | 0.445        | 1          | 2920        |
| HALLMARK_NOTCH_SIGNALING                   | 27   | 0.3 | <b>0.9</b> | 0.620     | 0.718        | 1          | 2027        |
| HALLMARK_REACTIVE_OXYGEN_SPECIES_PATHWAY   | 45   | 0.2 | <b>0.8</b> | 0.840     | 0.893        | 1          | 1075        |

## Pathways DOWN

| NAME                               | SIZE | ES   | NES         | NOM p-val | FDR q-val    | FWER p-val | RANK AT MAX |
|------------------------------------|------|------|-------------|-----------|--------------|------------|-------------|
| HALLMARK_PROTEIN_SECRETION         | 93   | -0.4 | <b>-1.9</b> | 0         | <b>0.005</b> | 0.004      | 3674        |
| HALLMARK_ANDROGEN_RESPONSE         | 92   | -0.4 | <b>-1.9</b> | 0         | <b>0.003</b> | 0.005      | 1274        |
| HALLMARK_FATTY_ACID_METABOLISM     | 129  | -0.4 | <b>-1.9</b> | 0         | <b>0.002</b> | 0.005      | 2466        |
| HALLMARK_OXIDATIVE_PHOSPHORYLATION | 197  | -0.4 | <b>-1.8</b> | 0         | <b>0.004</b> | 0.011      | 2741        |
| HALLMARK_CHOLESTEROL_HOMEOSTASIS   | 65   | -0.4 | <b>-1.7</b> | 0.002     | <b>0.006</b> | 0.024      | 1553        |
| HALLMARK_XENOBIOTIC_METABOLISM     | 133  | -0.4 | <b>-1.7</b> | 0         | <b>0.008</b> | 0.034      | 905         |
| HALLMARK_PEROXISOME                | 86   | -0.4 | <b>-1.6</b> | 0         | <b>0.023</b> | 0.116      | 1288        |
| HALLMARK_MTORC1_SIGNALING          | 192  | -0.3 | <b>-1.5</b> | 0         | <b>0.026</b> | 0.15       | 2405        |
| HALLMARK_KRAS_SIGNALING_UP         | 101  | -0.3 | <b>-1.5</b> | 0.024     | <b>0.030</b> | 0.189      | 967         |
| HALLMARK_GLYCOLYSIS                | 178  | -0.3 | <b>-1.5</b> | 0.005     | <b>0.029</b> | 0.204      | 2114        |
| HALLMARK_HYPOXIA                   | 163  | -0.3 | <b>-1.4</b> | 0.008     | <b>0.049</b> | 0.348      | 1327        |
| HALLMARK_HEME_METABOLISM           | 153  | -0.3 | <b>-1.4</b> | 0.012     | <b>0.049</b> | 0.371      | 1696        |
| HALLMARK_ADIPOGENESIS              | 172  | -0.3 | <b>-1.4</b> | 0.002     | <b>0.047</b> | 0.379      | 2710        |
| HALLMARK_MYOGENESIS                | 113  | -0.3 | <b>-1.4</b> | 0.031     | <b>0.077</b> | 0.569      | 1158        |
| HALLMARK_BILE_ACID_METABOLISM      | 67   | -0.3 | <b>-1.4</b> | 0.046     | <b>0.073</b> | 0.573      | 1274        |
| HALLMARK_IL2_STAT5_SIGNALING       | 133  | -0.3 | <b>-1.2</b> | 0.103     | <b>0.192</b> | 0.93       | 1195        |
| HALLMARK_MYC_TARGETS_V1            | 200  | -0.2 | <b>-1.2</b> | 0.134     | <b>0.248</b> | 0.969      | 3281        |
| HALLMARK_PI3K_AKT_MTOR_SIGNALING   | 88   | -0.3 | <b>-1.2</b> | 0.196     | 0.255        | 0.977      | 2114        |
| HALLMARK_UNFOLDED_PROTEIN_RESPONSE | 110  | -0.3 | <b>-1.1</b> | 0.205     | 0.293        | 0.99       | 3447        |
| HALLMARK_COMPLEMENT                | 119  | -0.2 | <b>-1.0</b> | 0.326     | 0.445        | 0.999      | 1132        |
| HALLMARK_UV_RESPONSE_UP            | 136  | -0.2 | <b>-1.0</b> | 0.462     | 0.554        | 1          | 2257        |
| HALLMARK_E2F_TARGETS               | 199  | -0.2 | <b>-1.0</b> | 0.542     | 0.608        | 1          | 2861        |
| HALLMARK_SPERMATOGENESIS           | 62   | -0.2 | <b>-1.0</b> | 0.518     | 0.605        | 1          | 2723        |
| HALLMARK_G2M_CHECKPOINT            | 198  | -0.2 | <b>-0.9</b> | 0.885     | 0.853        | 1          | 2943        |
| HALLMARK_DNA_REPAIR                | 144  | -0.2 | <b>-0.7</b> | 0.982     | 0.987        | 1          | 2676        |
| HALLMARK_MYC_TARGETS_V2            | 58   | -0.2 | <b>-0.7</b> | 0.977     | 0.987        | 1          | 3256        |

## Supplementary Table S6 Gene Set Enrichment Analysis (GSEA)

D538G Clones 1-4 v MCF7-WT

## Pathways UP

| NAME                                       | SIZE | ES  | NES        | NOM p-val | FDR q-val    | FWER p-val | RANK AT MAX |
|--------------------------------------------|------|-----|------------|-----------|--------------|------------|-------------|
| HALLMARK_INTERFERON_ALPHA_RESPONSE         | 82   | 0.7 | <b>2.8</b> | 0         | <b>0</b>     | 0          | 1755        |
| HALLMARK_INTERFERON_GAMMA_RESPONSE         | 141  | 0.6 | <b>2.4</b> | 0         | <b>0</b>     | 0          | 1670        |
| HALLMARK_ALLOGRAFT_REJECTION               | 85   | 0.4 | <b>1.5</b> | 0.013     | <b>0.044</b> | 0.154      | 2358        |
| HALLMARK_ESTROGEN_RESPONSE_EARLY           | 198  | 0.3 | <b>1.4</b> | 0.018     | <b>0.114</b> | 0.43       | 1282        |
| HALLMARK_HEDGEHOG_SIGNALING                | 26   | 0.4 | <b>1.4</b> | 0.071     | <b>0.119</b> | 0.527      | 1791        |
| HALLMARK_EPITHELIAL_MESENCHYMAL_TRANSITION | 119  | 0.3 | <b>1.3</b> | 0.022     | <b>0.103</b> | 0.543      | 580         |
| HALLMARK_APICAL_JUNCTION                   | 133  | 0.3 | <b>1.3</b> | 0.056     | <b>0.126</b> | 0.68       | 2105        |
| HALLMARK_P53_PATHWAY                       | 184  | 0.3 | <b>1.2</b> | 0.047     | <b>0.187</b> | 0.848      | 1547        |
| HALLMARK_APOPTOSIS                         | 123  | 0.3 | <b>1.2</b> | 0.146     | 0.288        | 0.961      | 2292        |
| HALLMARK_TGF_BETA_SIGNALING                | 51   | 0.3 | <b>1.1</b> | 0.238     | 0.273        | 0.966      | 770         |
| HALLMARK_INFLAMMATORY_RESPONSE             | 96   | 0.3 | <b>1.1</b> | 0.199     | 0.266        | 0.972      | 2175        |
| HALLMARK_IL6_JAK_STAT3_SIGNALING           | 46   | 0.3 | <b>1.1</b> | 0.311     | 0.307        | 0.987      | 1491        |
| HALLMARK_ANGIOGENESIS                      | 23   | 0.3 | <b>0.9</b> | 0.526     | 0.675        | 1          | 1373        |
| HALLMARK_UNFOLDED_PROTEIN_RESPONSE         | 110  | 0.2 | <b>0.9</b> | 0.739     | 0.797        | 1          | 566         |
| HALLMARK_MYC_TARGETS_V2                    | 58   | 0.2 | <b>0.7</b> | 0.969     | 0.979        | 1          | 3388        |

## Pathways DOWN

| NAME                                     | SIZE | ES   | NES         | NOM p-val | FDR q-val    | FWER p-val | RANK AT MAX |
|------------------------------------------|------|------|-------------|-----------|--------------|------------|-------------|
| HALLMARK_PROTEIN_SECRETION               | 93   | -0.5 | <b>-1.9</b> | 0         | <b>0.001</b> | 0.001      | 2063        |
| HALLMARK_FATTY_ACID_METABOLISM           | 129  | -0.5 | <b>-1.9</b> | 0         | <b>0.003</b> | 0.005      | 2688        |
| HALLMARK_HYPOXIA                         | 163  | -0.5 | <b>-1.8</b> | 0         | <b>0.002</b> | 0.007      | 1658        |
| HALLMARK_XENOBIOTIC_METABOLISM           | 133  | -0.5 | <b>-1.8</b> | 0         | <b>0.002</b> | 0.007      | 1231        |
| HALLMARK_GLYCOLYSIS                      | 178  | -0.4 | <b>-1.8</b> | 0         | <b>0.002</b> | 0.01       | 1960        |
| HALLMARK_OXIDATIVE_PHOSPHORYLATION       | 197  | -0.4 | <b>-1.8</b> | 0         | <b>0.003</b> | 0.014      | 3199        |
| HALLMARK_ANDROGEN_RESPONSE               | 92   | -0.5 | <b>-1.7</b> | 0.002     | <b>0.004</b> | 0.024      | 1642        |
| HALLMARK_ADIPOGENESIS                    | 172  | -0.4 | <b>-1.6</b> | 0.003     | <b>0.018</b> | 0.114      | 2853        |
| HALLMARK_KRAS_SIGNALING_UP               | 101  | -0.4 | <b>-1.6</b> | 0.003     | <b>0.023</b> | 0.162      | 1255        |
| HALLMARK_HEME_METABOLISM                 | 153  | -0.4 | <b>-1.6</b> | 0.002     | <b>0.021</b> | 0.165      | 1705        |
| HALLMARK_IL2_STAT5_SIGNALING             | 133  | -0.4 | <b>-1.5</b> | 0.005     | <b>0.029</b> | 0.242      | 1354        |
| HALLMARK_KRAS_SIGNALING_DN               | 76   | -0.4 | <b>-1.5</b> | 0.020     | <b>0.035</b> | 0.308      | 1291        |
| HALLMARK_CHOLESTEROL_HOMEOSTASIS         | 65   | -0.4 | <b>-1.5</b> | 0.024     | <b>0.041</b> | 0.383      | 2707        |
| HALLMARK_NOTCH_SIGNALING                 | 27   | -0.5 | <b>-1.4</b> | 0.084     | <b>0.083</b> | 0.648      | 1117        |
| HALLMARK_PEROXISOME                      | 86   | -0.4 | <b>-1.4</b> | 0.049     | <b>0.088</b> | 0.692      | 1594        |
| HALLMARK_MTORC1_SIGNALING                | 192  | -0.3 | <b>-1.3</b> | 0.023     | <b>0.108</b> | 0.786      | 2514        |
| HALLMARK_BILE_ACID_METABOLISM            | 67   | -0.4 | <b>-1.3</b> | 0.069     | <b>0.104</b> | 0.794      | 2699        |
| HALLMARK_UV_RESPONSE_DN                  | 124  | -0.3 | <b>-1.3</b> | 0.033     | <b>0.105</b> | 0.819      | 1977        |
| HALLMARK_ESTROGEN_RESPONSE_LATE          | 193  | -0.3 | <b>-1.2</b> | 0.096     | <b>0.206</b> | 0.972      | 1194        |
| HALLMARK_COAGULATION                     | 64   | -0.3 | <b>-1.2</b> | 0.183     | 0.277        | 0.999      | 1080        |
| HALLMARK_COMPLEMENT                      | 119  | -0.3 | <b>-1.2</b> | 0.175     | 0.271        | 0.999      | 1772        |
| HALLMARK_MYOGENESIS                      | 113  | -0.3 | <b>-1.1</b> | 0.215     | 0.373        | 1          | 2170        |
| HALLMARK_TNFA_SIGNALING_VIA_NFKB         | 156  | -0.3 | <b>-1.1</b> | 0.247     | 0.404        | 1          | 1426        |
| HALLMARK_UV_RESPONSE_UP                  | 136  | -0.3 | <b>-1.1</b> | 0.292     | 0.399        | 1          | 1890        |
| HALLMARK_PI3K_AKT_MTOR_SIGNALING         | 88   | -0.3 | <b>-1.0</b> | 0.362     | 0.488        | 1          | 2037        |
| HALLMARK_SPERMATOGENESIS                 | 62   | -0.3 | <b>-1.0</b> | 0.490     | 0.639        | 1          | 2539        |
| HALLMARK_WNT_BETA_CATENIN_SIGNALING      | 33   | -0.3 | <b>-0.9</b> | 0.606     | 0.854        | 1          | 246         |
| HALLMARK_MYC_TARGETS_V1                  | 200  | -0.2 | <b>-0.8</b> | 0.915     | 1.000        | 1          | 2772        |
| HALLMARK_MITOTIC_SPINDLE                 | 195  | -0.2 | <b>-0.8</b> | 0.943     | 1.000        | 1          | 2105        |
| HALLMARK_DNA_REPAIR                      | 144  | -0.2 | <b>-0.8</b> | 0.951     | 1.000        | 1          | 2800        |
| HALLMARK_APICAL_SURFACE                  | 26   | -0.3 | <b>-0.7</b> | 0.845     | 1.000        | 1          | 1297        |
| HALLMARK_REACTIVE_OXYGEN_SPECIES_PATHWAY | 45   | -0.2 | <b>-0.7</b> | 0.943     | 1.000        | 1          | 2778        |
| HALLMARK_G2M_CHECKPOINT                  | 198  | -0.1 | <b>-0.5</b> | 1.000     | 1.000        | 1          | 2883        |
| HALLMARK_E2F_TARGETS                     | 199  | -0.1 | <b>-0.4</b> | 1.000     | 1.000        | 1          | 2596        |

**Supplementary Table S7**  
**Differential genes common to all ESR1 mutations**

| Genes         | Cluster | Genes         | Cluster |
|---------------|---------|---------------|---------|
| RGAG4         | UP      | AP000439.3    | DOWN    |
| PRKAR2B       | UP      | MYZAP         | DOWN    |
| RAB31L1       | UP      | FSTL4         | DOWN    |
| DLC1          | UP      | MT1X          | DOWN    |
| TOX2          | UP      | RASD1         | DOWN    |
| B3GNT4        | UP      | KRT86         | DOWN    |
| ZNF385D       | UP      | CA2           | DOWN    |
| ZNF417        | UP      | ACSL4         | DOWN    |
| MUC3A         | UP      | NRP2          | DOWN    |
| PALM3         | UP      | RP11-466H18.1 | DOWN    |
| RP11-321G12.1 | UP      | ITPRIPL2      | DOWN    |
| CLIP4         | UP      | MUC1          | DOWN    |
| FOSL1         | UP      | ATP8A1        | DOWN    |
| MAG           | UP      | KRT81         | DOWN    |
| CD22          | UP      | SSPN          | DOWN    |
| OLFML3        | UP      | PLLP          | DOWN    |
| PROCR         | UP      | SEMA5A        | DOWN    |
| SMARCD3       | UP      | SCARA3        | DOWN    |
| KND1          | UP      | C9orf152      | DOWN    |
| ZNF416        | UP      | CEMIP         | DOWN    |
| SLC4A3        | UP      | PTPRN2        | DOWN    |
| FAM19A5       | UP      | VAT1L         | DOWN    |
| COL5A1        | UP      | CRAT          | DOWN    |
| C1orf95       | UP      | CEACAM6       | DOWN    |
| KCNMA1        | UP      | MDFIC         | DOWN    |
| PTGER3        | UP      | ERGIC1        | DOWN    |
| CDH2          | UP      | PTPRU         | DOWN    |
| PTGER2        | UP      | PP14571       | DOWN    |
| CRABP1        | UP      | PLXNA2        | DOWN    |
| RND2          | UP      | CYP2T2P       | DOWN    |
| GULP1         | UP      | MUC5AC        | DOWN    |
| PDZK1         | UP      | SLPI          | DOWN    |
| RERG          | UP      | CYP2S1        | DOWN    |
| SULT1A1       | UP      | PTGES         | DOWN    |
| NUAK2         | UP      | GDPD3         | DOWN    |
| C5AR2         | UP      | APCDD1        | DOWN    |
| APOL3         | UP      | C2orf54       | DOWN    |
| IFI35         | UP      | GALNT12       | DOWN    |
| UBE2L6        | UP      | FOXD2         | DOWN    |
| OAS2          | UP      | HSD17B11      | DOWN    |
| PARP10        | UP      | RAPGEF3       | DOWN    |
| PSMB8         | UP      | SLC9A2        | DOWN    |
| ACTG2         | UP      | WNT11         | DOWN    |
| PSMB9         | UP      | ABCG2         | DOWN    |
| TAP2          | UP      | EHD2          | DOWN    |
| KCNQ2         | UP      |               |         |
| MAP1B         | UP      |               |         |
| RP11-556I14.1 | UP      |               |         |
| MGP           | UP      |               |         |
| AL356737.1    | UP      |               |         |
| LANCL3        | UP      |               |         |
| FRAS1         | UP      |               |         |
| PMP22         | UP      |               |         |
| RP11-662G23.1 | UP      |               |         |
| SOCS1         | UP      |               |         |
| ANXA3         | UP      |               |         |
| OSGIN1        | UP      |               |         |
| CCDC85A       | UP      |               |         |
| AC007743.1    | UP      |               |         |
| CRABP2        | UP      |               |         |
| GPRC5C        | UP      |               |         |
| CA12          | UP      |               |         |
| NPY1R         | UP      |               |         |
| MAGEE1        | UP      |               |         |
| HCN4          | UP      |               |         |
| DLGAP3        | UP      |               |         |
| SEMA3D        | UP      |               |         |
| HMCN1         | UP      |               |         |
| AC005256.1    | UP      |               |         |
| PYCARD        | UP      |               |         |
| MTMR7         | UP      |               |         |
| GPC6          | UP      |               |         |
| COL3A1        | UP      |               |         |
| MTCL1         | UP      |               |         |
| FHL1          | UP      |               |         |
| GALNTL6       | UP      |               |         |
| NRG3          | UP      |               |         |
| PPP1R1C       | UP      |               |         |
| EPHA6         | UP      |               |         |
| NTSR1         | UP      |               |         |
| AC011747.4    | UP      |               |         |
| PSTPIP2       | UP      |               |         |
| NPR3          | UP      |               |         |
| LINC00052     | UP      |               |         |

|              |    |
|--------------|----|
| GATA4        | UP |
| PCDH17       | UP |
| FBN2         | UP |
| SLC30A3      | UP |
| FAM131C      | UP |
| UBASH3B      | UP |
| PLXNA4       | UP |
| SGPP2        | UP |
| NFIA         | UP |
| MYO10        | UP |
| LIMK1        | UP |
| ADA          | UP |
| DMTN         | UP |
| CLIP2        | UP |
| RAB31        | UP |
| NDRG4        | UP |
| NXN          | UP |
| FAM171A1     | UP |
| SYT8         | UP |
| THEMIS2      | UP |
| FBXO6        | UP |
| CDSN         | UP |
| LRRC61       | UP |
| ZBED6CL      | UP |
| PGBD5        | UP |
| NUPR1        | UP |
| GABBR1       | UP |
| CYP1A1       | UP |
| ZNF268       | UP |
| COL6A1       | UP |
| DIRAS1       | UP |
| COL6A2       | UP |
| PIK3CD       | UP |
| GPNMB        | UP |
| S100A7       | UP |
| ARMCX2       | UP |
| LPAR1        | UP |
| SLC22A31     | UP |
| RIN3         | UP |
| ATP8A2       | UP |
| SMOC2        | UP |
| SDK2         | UP |
| SMTNL2       | UP |
| ITGA2B       | UP |
| FBXO2        | UP |
| C15orf59     | UP |
| TRPV3        | UP |
| SLC47A1      | UP |
| GRIK3        | UP |
| PDLIM3       | UP |
| LRG1         | UP |
| IL24         | UP |
| FAIM3        | UP |
| RP11-564A8.4 | UP |
| IL20         | UP |
| C4A          | UP |
| CFB          | UP |
| SLC25A18     | UP |
| GPR68        | UP |
| ARTN         | UP |
| CPPED1       | UP |
| PREX1        | UP |
| B4GALNT1     | UP |
| ADORA1       | UP |
| HSPB8        | UP |
| RTN4RL1      | UP |
| CISH         | UP |
| APLP1        | UP |
| CHST8        | UP |
| FHL2         | UP |
| SDC2         | UP |
| RHOBTB1      | UP |
| LCN2         | UP |
| PXMP4        | UP |
| RILP         | UP |
| RP11-64B16.2 | UP |
| BMP2         | UP |
| ATP2B4       | UP |
| SELM         | UP |
| CPQ          | UP |
| PTK6         | UP |
| ARHGAP4      | UP |
| UBE2QL1      | UP |
| TCIRG1       | UP |
| IFI30        | UP |
| SLFN5        | UP |
| CAMK1        | UP |
| MESP2        | UP |



**Supplementary Table S8 Gene Set Enrichment Analysis (GSEA)**

**Differential genes common to all ESR1 mutations**

**Pathways UP**

| NAME                                       | # Genes in Gene Set (K) | # Genes in Overlap (k) | k/K    | FDR q-val | Genes                                                                |
|--------------------------------------------|-------------------------|------------------------|--------|-----------|----------------------------------------------------------------------|
| HALLMARK_UV_RESPONSE_DN                    | 144                     | 11                     | 0.0764 | 1.43E-10  | DLC1 FHL2 ATP2B4 PRKAR2B COL3A1 PMP22 SDC2 LPAR1 KCNMA1 MAP1B PIK3CD |
| HALLMARK_ESTROGEN_RESPONSE_EARLY           | 200                     | 11                     | 0.055  | 1.68E-09  | DLC1 FHL2 CISH PDLIM3 HSPB8 RAB31 CA12 NPY1R PDZK1 OLFML3 FAIM3      |
| HALLMARK_ESTROGEN_RESPONSE_LATE            | 200                     | 11                     | 0.055  | 1.68E-09  | ATP2B4 PRKAR2B CISH PDLIM3 HSPB8 RAB31 CA12 NPY1R PDZK1 PTGER3 CHST8 |
| HALLMARK_EPITHELIAL_MESENCHYMAL_TRANSITION | 200                     | 9                      | 0.045  | 3.80E-07  | COL3A1 PMP22 APLP1 COL6A2 COL5A1 CDH2 FBN2 MGP MAGEE1                |
| HALLMARK_INTERFERON_GAMMA_RESPONSE         | 200                     | 8                      | 0.04   | 4.45E-06  | IFI30 PSMB8 UBE2L6 PSMB9 IFI35 SOCS1 CFB OAS2                        |
| HALLMARK_INTERFERON_ALPHA_RESPONSE         | 97                      | 6                      | 0.0619 | 8.54E-06  | IFI30 PSMB8 UBE2L6 PSMB9 IFI35 PROCR                                 |
| HALLMARK_P53_PATHWAY                       | 200                     | 7                      | 0.035  | 4.10E-05  | IFI30 SOCS1 PROCR BMP2 NUPR1 ADA OSGIN1                              |
| HALLMARK_IL2_STAT5_SIGNALING               | 200                     | 6                      | 0.03   | 4.02E-04  | CISH APLP1 SOCS1 BMP2 PTGER2 COL6A1                                  |
| HALLMARK_UV_RESPONSE_UP                    | 158                     | 4                      | 0.0253 | 1.16E-02  | PDLIM3 APLP1 SULT1A1 CYP1A1                                          |
| HALLMARK_KRAS_SIGNALLING_UP                | 200                     | 4                      | 0.02   | 2.20E-02  | PSMB8 CFB BMP2 GPNMB                                                 |

**Pathways DOWN**

| NAME                           | # Genes in Gene Set (K) | # Genes in Overlap (k) | k/K    | FDR q-val | Genes                   |
|--------------------------------|-------------------------|------------------------|--------|-----------|-------------------------|
| HALLMARK_FATTY_ACID_METABOLISM | 158                     | 4                      | 0.0253 | 6.17E-04  | CRAT HSD17B11 ACSL4 CA2 |
| HALLMARK_PEROXISOME            | 104                     | 3                      | 0.0288 | 2.82E-03  | CRAT HSD17B11 ACSL4     |
| HALLMARK_XENOBIOTIC_METABOLISM | 200                     | 3                      | 0.015  | 1.28E-02  | CA2 PTGES CYP2S1        |

Supplementary Table S9 Gene Signatures: 136 UP and 42 DOWN genes

(In bold are the genes also present in the smaller gene set used in Signature 3)

| GeneID          | Gene     | baseMean     | Log2 FC rel MCF7 | padj         |
|-----------------|----------|--------------|------------------|--------------|
| ENSG00000106683 | LIMK1    | 2127.612527  | 1.278340889      | 7.0386E-112  |
| ENSG00000162599 | NFIA     | 532.4713641  | 3.658106963      | 4.68938E-93  |
| ENSG00000168461 | RAB31    | 285.805016   | 1.56473732       | 4.37688E-43  |
| ENSG00000103490 | PYCARD   | 1522.982631  | 1.378965893      | 6.42362E-42  |
| ENSG00000196839 | ADA      | 389.3664252  | 1.858394217      | 1.53942E-41  |
| ENSG00000164128 | NFIP1R   | 1490.1741    | 3.898461046      | 4.22897E-41  |
| ENSG00000162894 | FAM83B   | 758.083015   | 5.78203515       | 5.78203E-41  |
| ENSG00000158856 | DMTN     | 521.1526385  | 1.931654325      | 4.84692E-39  |
| ENSG00000167994 | RAB31L1  | 330.440047   | 1.25144047       | 2.03624E-37  |
| ENSG00000074410 | CA12     | 6398.835475  | 1.970130223      | 8.69857E-37  |
| ENSG00000140961 | OSGIN1   | 1501.526598  | 1.582380057      | 1.95331E-34  |
| ENSG00000152137 | HSPB8    | 2929.518789  | 4.382370696      | 2.98887E-33  |
| ENSG00000135454 | BAGALNT1 | 692.1763225  | 1.85626422       | 7.9385E-33   |
| ENSG00000198832 | SELM     | 330.6520524  | 1.609825832      | 1.41596E-31  |
| ENSG00000170412 | GPRC5C   | 1155.720125  | 1.530014104      | 5.5236E-31   |
| ENSG00000164741 | DLR1     | 1066.688345  | 3.258643697      | 1.05865E-27  |
| ENSG00000003987 | MTMR7    | 106.2107024  | 1.847110872      | 4.14666E-27  |
| ENSG00000142173 | COL16A2  | 332.8011362  | 2.831375691      | 3.70402E-25  |
| ENSG00000124126 | PREK1    | 28229.23249  | 2.022130021      | 8.16861E-25  |
| ENSG00000163891 | HLI      | 268.9236445  | 5.82590076       | 1.20344E-24  |
| ENSG00000138622 | HCN4     | 90.918415    | 2.092038918      | 2.08178E-24  |
| ENSG00000138772 | ANKA3    | 1080.585241  | 1.767148766      | 4.09661E-24  |
| ENSG00000185338 | SOC31    | 175.2183319  | 2.353513377      | 4.54724E-24  |
| ENSG00000136574 | GATA4    | 89.24544754  | 6.003473563      | 1.41931E-23  |
| ENSG00000103881 | CPPE1    | 401.9548423  | 1.297277143      | 2.18522E-23  |
| ENSG00000195902 | SULT1A1  | 337.2904752  | 1.7321892        | 1.28644E-22  |
| ENSG00000162892 | IL2L2    | 130.655232   | 5.89785182       | 1.51481E-22  |
| ENSG00000185924 | RITRNL1  | 1417.530617  | 1.287766197      | 2.29215E-22  |
| ENSG00000083817 | ZNF416   | 80.63248634  | 1.688059444      | 2.95122E-22  |
| ENSG00000109099 | PMP22    | 2050.349813  | 2.911951934      | 4.93698E-22  |
| ENSG00000163545 | NUAK2    | 181.8794595  | 2.6403374        | 4.99507E-22  |
| ENSG00000198934 | MAGE1E   | 111.4340339  | 1.707286537      | 6.02696E-22  |
| ENSG00000058668 | ATP2B4   | 6275.4465682 | 1.625352329      | 6.2532E-22   |
| ENSG00000216490 | IFI30    | 1255.787544  | 2.014343109      | 9.24181E-22  |
| ENSG00000134830 | CSAR2    | 702.6625059  | 2.13013705       | 3.16534E-21  |
| ENSG00000104324 | CPQ      | 88.71818893  | 2.075572726      | 5.19603E-21  |
| ENSG00000108830 | RND2     | 111.0205214  | 2.602415963      | 8.45056E-21  |
| ENSG00000187867 | PALM3    | 286.9622974  | 1.634158849      | 1.32394E-20  |
| ENSG0000016774  | QSOX3    | 912.6784431  | 1.76765443       | 1.26644E-20  |
| ENSG00000176046 | NUPL1    | 560.116359   | 5.079101048      | 2.20025E-20  |
| ENSG00000183098 | GPRC     | 974.0952546  | 1.587925807      | 2.27593E-20  |
| ENSG00000008204 | SMARCD3  | 321.1977448  | 1.595353793      | 9.54073E-20  |
| ENSG00000130635 | COL5A1   | 726.0561861  | 3.757664793      | 1.35954E-19  |
| ENSG00000168502 | MTCL1    | 668.8199598  | 1.769698819      | 1.40855E-19  |
| ENSG00000168542 | COL3A1   | 1779.243591  | 5.603891967      | 1.58289E-19  |
| ENSG00000171236 | UNC51    | 229.828961   | 1.63475959       | 2.72085E-19  |
| ENSG00000114923 | SILCA4   | 158.8096075  | 1.931646607      | 5.36758E-19  |
| ENSG00000114737 | CISH     | 568.1336586  | 1.437284441      | 1.05999E-18  |
| ENSG00000105290 | APLP1    | 425.1315479  | 1.237448742      | 1.16243E-18  |
| ENSG00000145555 | MYO10    | 1014.086034  | 2.113906792      | 1.61797E-18  |
| ENSG00000105995 | MAG      | 85.60297137  | 4.054905057      | 2.75924E-18  |
| ENSG0000012773  | RGA4     | 77.2364491   | 1.743952363      | 5.2777E-18   |
| ENSG00000176383 | B3GNT4   | 142.2799003  | 1.411628827      | 6.9724E-18   |
| ENSG00000005249 | PKAR2B   | 969.0399055  | 2.257031466      | 8.79545E-18  |
| ENSG00000127399 | LRC6L    | 308.3826763  | 2.196115977      | 1.17238E-17  |
| ENSG00000176490 | DIRAS1   | 168.0146684  | 2.604508851      | 1.29202E-17  |
| ENSG00000134533 | RERG     | 773.5594958  | 2.714208168      | 1.84794E-17  |
| ENSG00000107119 | TORG1    | 306.8046034  | 4.066503214      | 1.88848E-17  |
| ENSG00000215218 | UBR2     | 171.4403778  | 3.533923422      | 3.39196E-17  |
| ENSG00000188707 | ZBEDCL   | 157.8029195  | 2.412826858      | 4.14866E-17  |
| ENSG00000116544 | DLAGP3   | 93.47815442  | 1.609862886      | 4.47317E-17  |
| ENSG00000163082 | SGPP2    | 72.88461661  | 1.972186389      | 5.23506E-17  |
| ENSG00000124191 | TOX2     | 259.9010283  | 1.619229529      | 6.6481E-17   |
| ENSG00000103034 | NDRG4    | 416.8783589  | 1.133800587      | 6.75731E-17  |
| ENSG00000113941 | MGP      | 376.126017   | 3.842897078      | 6.88807E-17  |
| ENSG00000143320 | CRABP2   | 7465.121489  | 1.70595361       | 1.01817E-15  |
| ENSG00000156587 | UBE2L6   | 591.9008996  | 2.795879926      | 1.45422E-16  |
| ENSG00000163485 | ADORA1   | 653.980531   | 2.56347304       | 2.45284E-16  |
| ENSG00000166426 | CRABP1   | 789.2664028  | 2.108065333      | 7.43267E-16  |
| ENSG00000101213 | PTK6     | 205.8291632  | 2.703074023      | 1.70079E-15  |
| ENSG00000148468 | FAM171A1 | 144.2191229  | 1.819957316      | 1.87388E-15  |
| ENSG00000188176 | GNTM12   | 96.65591498  | 3.258438885      | 2.1114E-15   |
| ENSG00000177514 | PGRD5    | 184.0215077  | 2.580558807      | 2.60351E-15  |
| ENSG00000101000 | PROCR    | 79.01550583  | 1.848144105      | 5.23178E-15  |
| ENSG00000134072 | CAMK1    | 140.780296   | 1.75114949       | 6.2774E-15   |
| ENSG00000125384 | PTGER2   | 73.82703141  | 2.183319454      | 6.2774E-15   |
| ENSG00000101417 | PXMP4    | 139.7733747  | 1.247391588      | 6.82117E-15  |
| ENSG00000022667 | FH1      | 943.3549777  | 1.55474262       | 1.02849E-14  |
| ENSG00000144866 | GILP1    | 510.011758   | 2.43667722       | 1.301307E-14 |
| ENSG00000169439 | SDC2     | 1677.528906  | 2.344697157      | 1.36711E-14  |
| ENSG00000163873 | GRIK3    | 207.2086256  | 3.123154214      | 1.45957E-14  |
| ENSG00000116661 | FBXO2    | 134.3644036  | 3.645195213      | 2.07196E-14  |
| ENSG00000167705 | RILP     | 101.4715931  | 1.22280897       | 2.46073E-14  |
| ENSG00000174827 | PDXK1    | 1293.272299  | 2.548306462      | 4.74794E-14  |
| ENSG00000091880 | SDX2     | 146.2501159  | 2.74414378       | 5.74979E-14  |
| ENSG00000090612 | ZNF268   | 267.5240098  | 1.28373857       | 6.04489E-14  |
| ENSG00000115641 | FHL2     | 1463.655594  | 1.481971195      | 6.04489E-14  |
| ENSG00000138829 | FBN2     | 68.8985955   | 2.818892001      | 6.83622E-14  |
| ENSG00000116663 | FBXO6    | 125.3877431  | 2.999597636      | 7.96597E-14  |
| ENSG00000124302 | CHST8    | 181.2170044  | 1.816280265      | 8.08999E-14  |
| ENSG00000159993 | SEMA3D   | 129.4650703  | 3.820805821      | 1.50399E-13  |
| ENSG0000015813  | LOC65A   | 147.2632625  | 3.208070664      | 4.28128E-13  |
| ENSG00000152229 | PSIPIP2  | 288.5702754  | 2.546407252      | 5.52944E-13  |
| ENSG00000115194 | SIL30A3  | 218.2079403  | 1.468297801      | 6.72839E-13  |
| ENSG00000178685 | PARP10   | 478.2799923  | 3.81722585       | 8.57239E-13  |
| ENSG00000106665 | CLIP2    | 277.7625572  | 1.281467167      | 9.90843E-13  |
| ENSG00000171798 | KNDCL1   | 318.5109586  | 1.876953843      | 1.19262E-12  |
| ENSG00000068079 | IFI35    | 271.013463   | 2.070528791      | 1.32033E-12  |
| ENSG00000072422 | RHOC1B1  | 561.242415   | 1.66705928       | 1.61649E-12  |
| ENSG00000171608 | PKICD    | 75.3489588   | 2.52587589       | 2.01359E-12  |
| ENSG00000185519 | FAM131C  | 112.3420027  | 1.357906961      | 2.94511E-12  |
| ENSG00000205363 | C15orf59 | 153.1068128  | 4.35663503       | 1.63787E-12  |
| ENSG00000101188 | NTSR1    | 48.46696606  | 2.09214754       | 1.00318E-11  |
| ENSG00000142494 | SIL47A1  | 59.39261327  | 1.84522202       | 1.4176E-11   |
| ENSG00000204681 | GABRB1   | 60.2029797   | 1.79354812       | 1.61448E-11  |
| ENSG00000154553 | PDLIM3   | 89.10035413  | 2.846355798      | 1.70515E-11  |
| ENSG00000167693 | NXN      | 261.2182148  | 1.353450891      | 2.23566E-11  |
| ENSG00000219438 | FAM19A5  | 94.4973651   | 2.781628191      | 2.85808E-11  |
| ENSG00000154127 | UBASH3B  | 125.2288801  | 1.539939321      | 3.16078E-11  |
| ENSG00000166750 | SIFN5    | 231.5447269  | 2.261349734      | 4.37142E-11  |
| ENSG00000113389 | NPR3     | 272.162725   | 2.287148716      | 5.89564E-11  |
| ENSG00000142156 | COL4A1   | 247.3638466  | 1.85498367       | 1.36195E-10  |
| ENSG00000143341 | HMCN1    | 2268.205073  | 3.067057548      | 1.57326E-10  |
| ENSG00000089820 | ARHGAP4  | 150.6553979  | 1.68254551       | 2.46667E-10  |
| ENSG00000156113 | KCNMA1   | 67.60957989  | 1.80442893       | 5.07462E-10  |
| ENSG00000115295 | CLIP4    | 66.7188783   | 2.755791402      | 1.16313E-10  |
| ENSG00000163017 | ACTG2    | 168.2034337  | 3.077171887      | 6.6373E-10   |
| ENSG00000117111 | NOP58    | 106.9508211  | 1.69695728       | 3.91455E-09  |
| ENSG00000140465 | CYP11A1  | 164.2657206  | 2.567604864      | 3.91455E-09  |
| ENSG0000012124  | CD22     | 83.84841342  | 2.282878998      | 4.51663E-09  |
| ENSG00000117407 | ARTN     | 84.97991786  | 2.10280288       | 4.89938E-09  |
| ENSG00000240065 | PSMB9    | 166.091829   | 2.208824405      | 1.04405E-08  |
| ENSG00000100599 | RIN3     | 160.6190064  | 1.883993245      | 1.21404E-08  |
| ENSG00000198994 | MUC3A    | 118.5985382  | 1.824113799      | 1.4169E-08   |
| ENSG00000138759 | RHCA1    | 492.623518   | 1.760597192      | 2.15431E-08  |
| ENSG00000175592 | FOSL1    | 155.6831647  | 1.427930143      | 3.74359E-08  |
| ENSG00000149043 | SVT8     | 60.79391952  | 1.741382027      | 3.78992E-08  |
| ENSG00000119714 | GPR68    | 476.8409916  | 1.358442955      | 7.30374E-08  |
| ENSG00000173480 | ZNF417   | 87.37136504  | 1.271537304      | 2.23793E-07  |
| ENSG00000050628 | PTGER3   | 148.1614257  | 2.103630641      | 8.76815E-07  |
| ENSG00000243649 | CFB      | 60.7896275   | 1.368039775      | 1.31121E-06  |
| ENSG00000242457 | TAP2     | 1208.300467  | 1.145960288      | 2.27214E-06  |
| ENSG00000118946 | RCDH17   | 329.7931541  | 2.78646295       | 3.35729E-06  |
| ENSG00000080224 | EPHA6    | 92.46287047  | 1.583919245      | 7.62135E-06  |
| ENSG00000185737 | NR3      | 54.42340341  | 1.87323256       | 9.07331E-06  |
| ENSG00000221866 | PLXNA4   | 171.5474725  | 1.402242552      | 0.000128205  |

DOWN Genes

| EnsemblID       | Gene    | baseMean    | Log2 FC rel MCF7 | padj       |
|-----------------|---------|-------------|------------------|------------|
| ENSG00000170442 | KRT86   | 1685.903155 | -3.860351308     | 2.3152E-86 |
| ENSG00000113719 | ERGL1   | 8005.763442 | -1.574623721     | 1.7433E-85 |
| ENSG00000187193 | MTIX    | 1071.208428 | -2.002054989     | 7.6214E-36 |
| ENSG00000119514 | GALENT1 | 145.8370111 | -2.145887408     | 1.6691E-30 |
| ENSG00000060656 | PTPRU   | 1682.318215 | -1.364388829     | 1.5052E-29 |
| ENSG0000018416  | PP14571 | 165.6171265 | -4.044577827     | 3.715E-25  |
| ENSG00000186564 | FMO2    | 132.9391961 | -1.221627532     | 6.3885E-25 |
| ENSG00000108551 | RASD1   | 236.519776  | -2.784130081     | 3.151E-24  |
| ENSG00000115616 | SILCB2A | 391.4984557 | -1.513619045     | 1.4684E-23 |
| ENSG00000103888 | CEMP    | 653.5399667 | -2.253017277     | 3.22E-20   |
| ENSG00000148344 | PTGES   | 646.6722936 | -2.401177282     | 5.4482E-19 |
| ENSG00000079337 | PAPGFE3 | 79.41071911 | -1.792884055     | 1.015E-18  |
| ENSG00000167600 | CYP251  | 112.4477159 | -2.068139873     | 5.2351E-17 |
| ENSG00000051008 | FSTL4   | 87.8505209  | -2.02832105      | 5.7084E-17 |
| ENSG00000102934 | PLP     | 260.4319289 | -2.296944539     | 1.8982E-16 |
| ENSG00000168077 | SCARA3  | 329.8696968 | -2.07386431      | 5.2521E-16 |
| ENSG00000076356 | PLXNA2  | 175.1479982 | -2.560026651     | 3.5354E-15 |
| ENSG00000263155 | MYZAP</ |             |                  |            |

### Supplementary Table S10 Gene Signature 3

#### UP Genes

| EnsembleID             | Gene          | baseMean           | Log2 FC rel MCF7   | padj               |
|------------------------|---------------|--------------------|--------------------|--------------------|
| ENSG00000162599        | NFIA          | 532.4713641        | 3.658160963        | 4.68938E-93        |
| ENSG00000164128        | NPY1R         | 1490.41942         | 3.898461046        | 4.22397E-41        |
| ENSG00000162894        | FAIM3         | 253.0833015        | 4.268865966        | 5.7856E-40         |
| <b>ENSG00000158856</b> | <b>DMTN</b>   | <b>521.1526385</b> | <b>1.931654325</b> | <b>4.84692E-39</b> |
| ENSG00000167994        | RAB3IL1       | 330.4408154        | 2.15144047         | 2.03624E-37        |
| <b>ENSG00000074410</b> | <b>CA12</b>   | <b>6398.835475</b> | <b>1.970130223</b> | <b>8.69857E-37</b> |
| <b>ENSG00000003987</b> | <b>MTMR7</b>  | <b>106.2107024</b> | <b>1.847210872</b> | <b>4.14666E-27</b> |
| <b>ENSG00000162891</b> | <b>IL20</b>   | <b>268.9226145</b> | <b>5.82590076</b>  | <b>1.20244E-24</b> |
| <b>ENSG00000136574</b> | <b>GATA4</b>  | <b>89.24544754</b> | <b>6.003473563</b> | <b>1.41931E-23</b> |
| <b>ENSG00000188176</b> | <b>SMTNL2</b> | <b>96.65591498</b> | <b>3.258438859</b> | <b>2.11013E-15</b> |
| ENSG00000137628        | DDX60         | 274.1966187        | 4.677465386        | 3.97364E-12        |
